# Supplementary material for: A systematic review of methodological quality of model development studies predicting prognostic outcome for resectable pancreatic cancer
Source: PubMed Central journal article supplement — BMJ Open. 2019 Aug 21;9(8):e027192. doi: 10.1136/bmjopen-2018-027192 (PMC6707674; doi:10.1136/bmjopen-2018-027192), 2019-08-21
Supplement: bmjopen-2018-027192supp001.pdf [file bmjopen-2018-027192supp001.pdf]

## Appendix S1: full list of search terms

| MeSH Terms                                                                                                                                                | Associated Entry Terms                                                                                                                                                                                                                                                                                                                                                                                                                                                                                                                                                                                                                                                                                                                                                         |
|-----------------------------------------------------------------------------------------------------------------------------------------------------------|--------------------------------------------------------------------------------------------------------------------------------------------------------------------------------------------------------------------------------------------------------------------------------------------------------------------------------------------------------------------------------------------------------------------------------------------------------------------------------------------------------------------------------------------------------------------------------------------------------------------------------------------------------------------------------------------------------------------------------------------------------------------------------|
| ("pancreatic neoplasms" [MeSH Terms] OR "Pancreatic cancer" [All Fields] OR "Carcinoma, pancreatic ductal" [MeSH Terms] OR "Pancreatic ductal carcinoma") | <ul style="list-style-type: none"> <li>• Carcinomas, Pancreatic Ductal</li> <li>• Ductal Carcinoma, Pancreatic</li> <li>• Ductal Carcinomas, Pancreatic</li> <li>• Pancreatic Ductal Carcinomas</li> <li>• Duct-Cell Carcinoma of the Pancreas</li> <li>• Duct Cell Carcinoma of the Pancreas</li> <li>• Pancreatic Ductal Carcinoma</li> <li>• Ductal Carcinoma of the Pancreas</li> <li>• Pancreatic Duct Cell Carcinoma</li> <li>• Carcinoma, Ductal, Pancreatic</li> <li>• Duct-Cell Carcinoma, Pancreas</li> <li>• Carcinoma, Pancreas Duct-Cell</li> <li>• Carcinomas, Pancreas Duct-Cell</li> <li>• Duct Cell Carcinoma, Pancreas</li> <li>• Duct-Cell Carcinomas, Pancreas</li> <li>• Pancreas Duct-Cell Carcinoma</li> <li>• Pancreas Duct-Cell Carcinomas</li> </ul> |
| ("pancreaticoduodenectomy"[MeSH Terms] OR "pancreaticoduodenectomy"[All Fields])                                                                          | <ul style="list-style-type: none"> <li>• Pancreaticoduodenectomies</li> <li>• Pancreatoduodenectomy</li> <li>• Pancreatoduodenectomies</li> <li>• Duodenopancreatectomy</li> <li>• Duodenopancreatectomies</li> </ul>                                                                                                                                                                                                                                                                                                                                                                                                                                                                                                                                                          |
| ("prognosis"[MeSH Terms] OR "prognosis"[All Fields])                                                                                                      | <ul style="list-style-type: none"> <li>• Prognoses</li> <li>• Prognostic Factors</li> <li>• Factor, Prognostic</li> <li>• Factors, Prognostic</li> <li>• Prognostic Factor</li> </ul>                                                                                                                                                                                                                                                                                                                                                                                                                                                                                                                                                                                          |
| ("Prognostic" [All Fields] OR "model" [All Fields])                                                                                                       | <ul style="list-style-type: none"> <li>• Nomogram</li> <li>• Partin Tables</li> <li>• Partin Table</li> <li>• Table, Partin</li> <li>• Tables, Partin</li> <li>• Partin Nomograms</li> <li>• Nomogram, Partin</li> <li>• Nomograms, Partin</li> <li>• Partin Nomogram</li> </ul>                                                                                                                                                                                                                                                                                                                                                                                                                                                                                               |
| ("Survival analysis" [MeSH terms] OR "survival analysis" [All Fields])                                                                                    | <ul style="list-style-type: none"> <li>• Analysis, Survival</li> <li>• Analyses, Survival</li> </ul>                                                                                                                                                                                                                                                                                                                                                                                                                                                                                                                                                                                                                                                                           |

|                                                                                                     |                                                                                                                                                                                                                                                                                                                                                                                                                                                                                                                                                                                                                                                                                                                                                                                       |
|-----------------------------------------------------------------------------------------------------|---------------------------------------------------------------------------------------------------------------------------------------------------------------------------------------------------------------------------------------------------------------------------------------------------------------------------------------------------------------------------------------------------------------------------------------------------------------------------------------------------------------------------------------------------------------------------------------------------------------------------------------------------------------------------------------------------------------------------------------------------------------------------------------|
|                                                                                                     | <ul style="list-style-type: none"> <li>• Survival Analyses</li> </ul>                                                                                                                                                                                                                                                                                                                                                                                                                                                                                                                                                                                                                                                                                                                 |
| <p>("Proportional hazards model" [MeSH terms] OR "cox proportional hazards model" [All Fields])</p> | <ul style="list-style-type: none"> <li>• Proportional Hazard Models</li> <li>• Hazard Model, Proportional</li> <li>• Hazard Models, Proportional</li> <li>• Model, Proportional Hazard</li> <li>• Models, Proportional Hazard</li> <li>• Proportional Hazard Model</li> <li>• Models, Proportional Hazards</li> <li>• Hazards Model, Proportional</li> <li>• Hazards Models, Proportional</li> <li>• Model, Proportional Hazards</li> <li>• Proportional Hazards Model</li> <li>• Hazards Models</li> <li>• Hazards Model</li> <li>• Model, Hazards</li> <li>• Models, Hazards</li> <li>• Hazard Models</li> <li>• Hazard Model</li> <li>• Model, Hazard</li> <li>• Models, Hazard</li> <li>• Cox Proportional Hazards Models</li> <li>• Cox Models</li> <li>• Models, Cox</li> </ul> |
| <p>("models, statistical"[MeSH Terms] OR "statistical model"[All Fields])</p>                       | <ul style="list-style-type: none"> <li>• Statistical Model</li> <li>• Probabilistic Models</li> <li>• Model, Probabilistic</li> <li>• Models, Probabilistic</li> <li>• Probabilistic Model</li> <li>• Model, Statistical</li> <li>• Statistical Models</li> <li>• Models, Polynomial</li> <li>• Model, Polynomial</li> <li>• Polynomial Model</li> <li>• Polynomial Models</li> <li>• Two-Parameter Models</li> <li>• Model, Two-Parameter</li> <li>• Models, Two-Parameter</li> <li>• Two Parameter Models</li> <li>• Two-Parameter Model</li> <li>• Models, Binomial</li> <li>• Binomial Model</li> <li>• Binomial Models</li> <li>• Model, Binomial</li> </ul>                                                                                                                     |
| <p>("linear models"[MeSH Terms] OR "linear model"[All Fields])</p>                                  | <ul style="list-style-type: none"> <li>• Models, Linear</li> <li>• Linear Model</li> <li>• Model, Linear</li> <li>• Log-Linear Models</li> </ul>                                                                                                                                                                                                                                                                                                                                                                                                                                                                                                                                                                                                                                      |

|                                                                                                       |                                                                                                                                                                                                                                                                                                                                                                                                                                          |
|-------------------------------------------------------------------------------------------------------|------------------------------------------------------------------------------------------------------------------------------------------------------------------------------------------------------------------------------------------------------------------------------------------------------------------------------------------------------------------------------------------------------------------------------------------|
|                                                                                                       | <ul style="list-style-type: none"> <li>• Log Linear Models</li> <li>• Log-Linear Model</li> <li>• Model, Log-Linear</li> <li>• Models, Log-Linear</li> <li>• Linear Regression</li> <li>• Linear Regressions</li> <li>• Regression, Linear</li> <li>• Regressions, Linear</li> </ul>                                                                                                                                                     |
| ("logistic models"[MeSH Terms] OR "logistic model"[All Fields])                                       | <ul style="list-style-type: none"> <li>• Logistic Model</li> <li>• Model, Logistic</li> <li>• Models, Logistic</li> <li>• Logit Models</li> <li>• Logit Model</li> <li>• Model, Logit</li> <li>• Models, Logit</li> <li>• Logistic Regression</li> <li>• Logistic Regressions</li> <li>• Regression, Logistic</li> <li>• Regressions, Logistic</li> </ul>                                                                                |
| ("nomograms"[MeSH Terms] OR "nomogram"[All Fields])                                                   | <ul style="list-style-type: none"> <li>• Nomogram</li> <li>• Partin Tables</li> <li>• Partin Table</li> <li>• Table, Partin</li> <li>• Tables, Partin</li> <li>• Partin Nomograms</li> <li>• Nomogram, Partin</li> <li>• Nomograms, Partin</li> <li>• Partin Nomogram</li> </ul>                                                                                                                                                         |
| ("bayes theorem"[MeSH Terms] OR "bayesian prediction"[All Fields])                                    | <ul style="list-style-type: none"> <li>• Theorem, Bayes</li> <li>• Bayesian Forecast</li> <li>• Forecast, Bayesian</li> <li>• Bayesian Prediction</li> <li>• Prediction, Bayesian</li> <li>• Bayesian Analysis</li> <li>• Bayesian Approach</li> <li>• Approach, Bayesian</li> <li>• Approaches, Bayesian</li> <li>• Bayesian Approaches</li> <li>• Analysis, Bayesian</li> <li>• Bayesian Method</li> <li>• Method, Bayesian</li> </ul> |
| ("artificial intelligence"[MeSH Terms] OR "AI" [All Fields] OR "artificial intelligence"[All Fields]) | <ul style="list-style-type: none"> <li>• Intelligence, Artificial</li> <li>• Computational Intelligence</li> <li>• Intelligence, Computational</li> <li>• Machine Intelligence</li> <li>• Intelligence, Machine</li> </ul>                                                                                                                                                                                                               |

|                                                                                                                                                         |                                                                                                                                                                                                                                                                                                                                                                                                                                                                                                                                                                                                          |
|---------------------------------------------------------------------------------------------------------------------------------------------------------|----------------------------------------------------------------------------------------------------------------------------------------------------------------------------------------------------------------------------------------------------------------------------------------------------------------------------------------------------------------------------------------------------------------------------------------------------------------------------------------------------------------------------------------------------------------------------------------------------------|
|                                                                                                                                                         | <ul style="list-style-type: none"> <li>• Computer Reasoning</li> <li>• Reasoning, Computer</li> <li>• AI (Artificial Intelligence)</li> <li>• Computer Vision Systems</li> <li>• Computer Vision System</li> <li>• System, Computer Vision</li> <li>• Systems, Computer Vision</li> <li>• Vision System, Computer</li> <li>• Vision Systems, Computer</li> <li>• Knowledge Acquisition (Computer)</li> <li>• Acquisition, Knowledge (Computer)</li> <li>• Knowledge Representation (Computer)</li> <li>• Knowledge Representations (Computer)</li> <li>• Representation, Knowledge (Computer)</li> </ul> |
| ("neural networks (computer)"[MeSH Terms] OR "neural network model"[All Fields])                                                                        | <ul style="list-style-type: none"> <li>• Network, Neural (Computer)</li> <li>• Networks, Neural (Computer)</li> <li>• Neural Network (Computer)</li> <li>• Perceptrons</li> <li>• Perceptron</li> <li>• Neural Network Models</li> <li>• Connectionist Models</li> <li>• Connectionist Model</li> <li>• Model, Connectionist</li> <li>• Models, Connectionist</li> <li>• Models, Neural Network</li> <li>• Model, Neural Network</li> <li>• Network Model, Neural</li> <li>• Network Models, Neural</li> <li>• Neural Network Model</li> </ul>                                                           |
| ("fuzzy logic"[MeSH Terms] OR "fuzzy logic"[All Fields])                                                                                                | <ul style="list-style-type: none"> <li>•</li> </ul>                                                                                                                                                                                                                                                                                                                                                                                                                                                                                                                                                      |
| ("precision medicine"[MeSH Terms] OR "precision medicine" [All Fields] OR "personalized medicine" [All Fields] OR "personalised medicine" [All Fields]) | <ul style="list-style-type: none"> <li>• Medicine, Precision</li> <li>• Personalized Medicine</li> <li>• Medicine, Personalized</li> <li>• Individualized Medicine</li> <li>• Medicine, Individualized</li> </ul>                                                                                                                                                                                                                                                                                                                                                                                        |
| ("calculator"[All Fields])                                                                                                                              | <ul style="list-style-type: none"> <li>•</li> </ul>                                                                                                                                                                                                                                                                                                                                                                                                                                                                                                                                                      |
| ("risk assessment"[MeSH Terms] OR "risk assessment"[All Fields])                                                                                        | <ul style="list-style-type: none"> <li>•</li> </ul>                                                                                                                                                                                                                                                                                                                                                                                                                                                                                                                                                      |
| ("mortality"[Subheading] OR "mortality"[MeSH Terms] OR                                                                                                  | <ul style="list-style-type: none"> <li>•</li> </ul>                                                                                                                                                                                                                                                                                                                                                                                                                                                                                                                                                      |

|                          |
|--------------------------|
| “mortality”[All Fields]) |
|--------------------------|

Search terms used on entire MEDLINE, Embase, PubMed, Cochrane and Google Scholar databases up to and including 31<sup>st</sup> July 2018 with no further date restrictions applied:

((“pancreatic neoplasms” [MeSH Terms] OR “Pancreatic cancer” [All Fields] OR “Carcinoma, pancreatic ductal” [MeSH Terms] OR “Pancreatic ductal carcinoma”) OR (“pancreaticoduodenectomy”[MeSH Terms] OR “pancreaticoduodenectomy”[All Fields]) AND (“prognosis”[MeSH Terms] OR “prognosis”[All Fields]) OR (“Prognostic” [All Fields] OR “model” [All Fields]) OR (“Survival analysis” [MeSH terms] OR “survival analysis” [All Fields]) OR (“Proportional hazards model” [MeSH terms] OR “cox proportional hazards model” [All Fields]) OR (“models, statistical”[MeSH Terms] OR “statistical model”[All Fields]) OR (“linear models”[MeSH Terms] OR “linear model”[All Fields]) OR (“logistic models”[MeSH Terms] OR “logistic model”[All Fields]) OR (“nomograms”[MeSH Terms] OR “nomogram”[All Fields]) OR (“bayes theorem”[MeSH Terms] OR “bayesian prediction”[All Fields]) OR (“artificial intelligence”[MeSH Terms] OR “AI” [All Fields] OR “artificial intelligence”[All Fields]) OR (“neural networks (computer)”[MeSH Terms] OR “neural network model”[All Fields]) OR (“fuzzy logic”[MeSH Terms] OR “fuzzy logic”[All Fields]) OR (“precision medicine”[MeSH Terms] OR “precision medicine” [All Fields] OR “personalized medicine” [All Fields] OR “personalised medicine” [All Fields]) OR (“calculator”[All Fields]) OR (“risk assessment”[MeSH Terms] OR “risk assessment”[All Fields]) OR (“mortality”[Subheading] OR “mortality”[MeSH Terms] OR “mortality”[All Fields]))
