# Supplementary material for: A systematic review of methodological quality of model development studies predicting prognostic outcome for resectable pancreatic cancer
Source: PubMed Central journal article supplement — BMJ Open. 2019 Aug 21;9(8):e027192. doi: 10.1136/bmjopen-2018-027192 (PMC6707674; doi:10.1136/bmjopen-2018-027192), 2019-08-21
Supplement: bmjopen-2018-027192supp002.pdf [file bmjopen-2018-027192supp002.pdf]

## Appendix S2: summary of included model development studies

| Study                                    | Data Source and Study Population Size | Model Outcome                     | Candidate Variables | Method of Predictor Selection                                                       | Included Predictor Variables                                                                                                                                                                         | Missing Data                          | Modeling Method                                  | Model Performance and Validation                                                                                                                                              | Presentation |
|------------------------------------------|---------------------------------------|-----------------------------------|---------------------|-------------------------------------------------------------------------------------|------------------------------------------------------------------------------------------------------------------------------------------------------------------------------------------------------|---------------------------------------|--------------------------------------------------|-------------------------------------------------------------------------------------------------------------------------------------------------------------------------------|--------------|
| Brennan <i>et al.</i> 2004 <sup>22</sup> | Single institution database (n=555)   | 1,2,3 year survival               | n=14                | Cox multivariate analysis; p-value but non significant variables included           | age, sex, portal vein inclusion, splenectomy, margin, location, differentiation, posterior margin, nodes positive, nodes negative, back pain, T stage, weight loss, maximum pathological axis (n=14) | Predicted using regression models     | Multivariate Cox proportional hazards regression | Calibration plot: good fit<br>Discrimination: c-statistic 0.64<br>External Evaluation: absent; internal validation by bootstrap method                                        | Nomogram     |
| Kanda <i>et al.</i> 2014 <sup>23</sup>   | Single institution database (n=324)   | Death within 12 months of surgery | n=19                | Pre-selection by Univariate analysis then Cox multivariate analysis. P-value < 0.1  | CEA, CA19-9 (n=2)                                                                                                                                                                                    | Complete case analysis                | Multivariate Cox proportional hazards regression | Calibration: absent<br>Discrimination: AUC 0.702<br>External Evaluation: absent                                                                                               | Index        |
| Miura <i>et al.</i> 2014 <sup>24</sup>   | Single institution database (n=50)    | 1,3,5 year survival               | n=50                | Pre-selection by Univariate analysis then Cox multivariate analysis. P-value < 0.05 | Platelet count, CRP, CA19-9 (n=3)                                                                                                                                                                    | Complete case analysis                | Multivariate Cox proportional hazards regression | Calibration: none<br>Discrimination: none<br>External Evaluation: absent                                                                                                      | Score        |
| Shen <i>et al.</i> 2018 <sup>18</sup>    | Multi-centre databases (n=239)        | 6,12,18 month survival            | n=17                | Pre-selection by Univariate analysis then Cox multivariate analysis. P-value < 0.05 | age, length of tumour contact, peripancreatic venous abnormality, lymph node staging (n=4)                                                                                                           |                                       | Multivariate Cox proportional hazards regression | Calibration plot: good fit<br>Discrimination: c-statistic 0.824<br>External Evaluation: performed                                                                             | Nomogram     |
| Xu <i>et al.</i> 2017 <sup>25</sup>      | Single institution database (n=265)   | 1,3,5 year survival               | n=14                | Pre-selection by Univariate analysis then Cox multivariate analysis. P-value < 0.05 | Tumour grade, pathological stage, neural invasion, vascular invasion, Neutrophil Lymphocyte Ratio, Platelet to Lymphocyte Ratio, Albumin Globulin Ratio (n=7)                                        |                                       | Multivariate Cox proportional hazards regression | Calibration: calibration curve<br>Discrimination: 1yr: c-index 0.86, AUC: 0.938. 3yr: c-index 0.837, AUC 0.844, 5yr: c-index: 0.809, AUC 0.884<br>External Evaluation: absent | Nomogram     |
| Walczak & Velanovich 2017 <sup>26</sup>  | Single institution database (n=219)   | 7 month survival post surgery     | n=7                 | Single hidden layer back propagation trained ANN.                                   | age, sex, stage, survival time, quality of life, adjuvant therapy, resection details (n=7)                                                                                                           | Complete case analysis                | Artificial Neural Network                        | Calibration: absent<br>Discrimination: AUC: 0.6576, sensitivity 91.30%, specificity 38.27%<br>External Validation: absent; internal validation by random split method         | Calculator   |
| Hsu <i>et al.</i> 2012 <sup>27</sup>     | Single institution database (n=740)   | Death at 9 and 12 months          | n=15                | Pre-selection by Univariate analysis then Cox multivariate analysis. P-value < 0.05 | age, tumour size, comorbidities, tumour grade (n=4)                                                                                                                                                  | Complete case analysis                | Multivariate Cox proportional hazards regression | Calibration: none<br>Discrimination: none<br>External Validation: absent; internal validation with p-value < 0.05                                                             | Score        |
| Botsis <i>et al.</i> 2009 <sup>28</sup>  | Single institution database (n=218)   | Survival time                     | n=26                | Pre-selection by Univariate analysis then Cox multivariate analysis. P-value < 0.05 | Age, differentiation, tumour size, Alk Phos, Albumin, Ca19-9 (n=6)                                                                                                                                   | MICE presuming data missing at random | Multivariate Cox proportional hazards regression | Calibration: absent<br>Discrimination: c-statistic 0.73<br>External Validation: absent; internal validation by bootstrap method                                               | Score        |
| Liu <i>et al.</i> 2018 <sup>29</sup>     | Multi-centre                          | Survival time                     | n=10                | Pre-selection by                                                                    | American Joint Commission on                                                                                                                                                                         |                                       | Multivariate Cox                                 | Calibration: absent                                                                                                                                                           | Score        |

|                                          |                                     |                               |      |                                                                                                                                              |                                                                                                                                                                |                        |                                                  |                                                                                                                                                                        |            |
|------------------------------------------|-------------------------------------|-------------------------------|------|----------------------------------------------------------------------------------------------------------------------------------------------|----------------------------------------------------------------------------------------------------------------------------------------------------------------|------------------------|--------------------------------------------------|------------------------------------------------------------------------------------------------------------------------------------------------------------------------|------------|
|                                          | databases (n=1223)                  |                               |      | Univariate analysis then Cox multivariate analysis. P-value <0.05                                                                            | Cancer stage, tumour grade, post-operative Ca19-9 (n=3)                                                                                                        |                        | proportional hazards regression                  | Discrimination: c-statistic 0.70, AIC: 2406.37<br>External Validation: absent; internal validation by random split method                                              |            |
| Balzano <i>et al.</i> 2017 <sup>18</sup> | Single institution database (n=296) | 1 year mortality              | n=56 | Pre-selection by Univariate analysis then Cox multivariate analysis. P-value <0.2 for univariate analysis and <0.1 for multivariate analysis | American Society of Anaesthesiologists' score, Geriatric Nutritional Risk Index, abdominal/back pain, non metastatic liver disease or insulin resistance (n=4) |                        | Multivariate Cox proportional hazards regression | Calibration: Hosmer-Lemeshow 0.403.<br>Discrimination: R <sup>2</sup> 53.5%, AUC: 88.7%.<br>External Validation performed                                              | Score      |
| Smith & Mezhir 2014 <sup>20</sup>        | National Registry Database (n=6400) | 6 months, 1,3,5 year survival | n=12 | Backward stepdown selection process                                                                                                          | Survival: age, gender, marital status, race, grade, histology, T&M, size, radiation, Lymph Node Ratio (n=11). Lymph node ratio: grade T&M stage, size (n=4)    | Complete case analysis | Bayesian Model                                   | Calibration curve: goodness-of-fit statistic 0.4847<br>Discrimination: c-statistic: 0.65<br>External Validation: absent; internal validation by random split method    | Calculator |
| Pu <i>et al.</i> 2017 <sup>31</sup>      | Single institution database (n=220) | 1,2,3 year survival           | n=20 | Pre-selection by Univariate analysis then Cox multivariate analysis. P-value <0.05                                                           | Differentiation, American Joint Commission on Cancer stage, Alkaline Phosphate to Albumin Ratio (n=3)                                                          | Complete case analysis | Multivariate Cox proportional hazards regression | Calibration curve: optimal consistency<br>Discrimination: training: 0.673 validation: 0.693<br>External validation: absent; internal validation by random split method | Nomogram   |
| Dasari <i>et al.</i> 2015 <sup>20</sup>  | Single institution database (n=567) | 1,3 year survival             | n=13 | Pre-selection by Univariate analysis then Cox multivariate analysis. P-value <0.05                                                           | Tumour site, T stage, Lymph Node Ratio (n=3)                                                                                                                   | Complete case analysis | Multivariate Cox proportional hazards regression | Calibration: none<br>Discrimination: AUC 1yr & 3yr: 0.66 & 0.74<br>External Validation performed                                                                       | Index      |
| Pu <i>et al.</i> 2018 <sup>21</sup>      | National Registry Database (n=3458) | 1,3,5 year survival           | n=12 | Pre-selection by Univariate analysis then Cox multivariate analysis. P-value <0.05                                                           | Age, grade, T stage (n=3)                                                                                                                                      | Complete case analysis | Multivariate Cox proportional hazards regression | Calibration curve: optimal fit<br>Discrimination: c-statistic 0.63<br>External and internal validation performed using bootstrap method                                | Nomogram   |
| Katz <i>et al.</i> 2012 <sup>22</sup>    | National Registry Database (n=5736) | 3 year survival               | n=7  | Pre-selection by Univariate analysis then Cox multivariate analysis. P-value <0.05                                                           | Age, gender, race, site, grade, stage, radiotherapy (n=7)                                                                                                      | Complete case analysis | Multivariate Cox proportional hazards regression | Calibration curve: results not reported<br>Discrimination: absent<br>External Validation: absent                                                                       | Calculator |
