# Supplementary material for: A systematic review of methodological quality of model development studies predicting prognostic outcome for resectable pancreatic cancer
Source: PubMed Central journal article supplement — BMJ Open. 2019 Aug 21;9(8):e027192. doi: 10.1136/bmjopen-2018-027192 (PMC6707674; doi:10.1136/bmjopen-2018-027192), 2019-08-21
Supplement: bmjopen-2018-027192supp003.pdf [file bmjopen-2018-027192supp003.pdf]

### Appendix S3: Assessment of Risk of Bias of Included Studies Using Prediction model Risk of Bias Assessment Tool (PROBAST)<sup>17</sup>

| Study                                    | Risk of Bias |             |          |          | Applicability |            |         | Overall      |               |
|------------------------------------------|--------------|-------------|----------|----------|---------------|------------|---------|--------------|---------------|
|                                          | Participants | Predictors* | Outcome* | Analysis | Participants  | Predictors | Outcome | Risk of Bias | Applicability |
| Brennan <i>et al.</i> 2004 <sup>22</sup> | +            | -           | -        | +        | ?             | +          | +       | +            | +             |
| Kanda <i>et al.</i> 2014 <sup>23</sup>   | ?            | -           | -        | -        | ?             | +          | +       | -            | +             |
| Miura <i>et al.</i> 2014 <sup>24</sup>   | ?            | -           | -        | -        | ?             | +          | +       | -            | +             |
| Shen <i>et al.</i> 2018 <sup>18</sup>    | ?            | -           | -        | -        | +             | +          | +       | -            | +             |
| Xu <i>et al.</i> 2017 <sup>25</sup>      | ?            | -           | -        | -        | ?             | +          | +       | -            | +             |
| Walczak & Velanovich 2017 <sup>26</sup>  | ?            | ?           | -        | -        | ?             | +          | +       | ?            | +             |
| Hsu <i>et al.</i> 2012 <sup>27</sup>     | +            | -           | -        | ?        | ?             | +          | +       | +/?          | +             |
| Botsis <i>et al.</i> 2009 <sup>8</sup>   | ?            | -           | -        | -        | ?             | +          | +       | -            | +             |
| Liu <i>et al.</i> 2018 <sup>29</sup>     | +            | ?           | -        | ?        | +             | +          | +       | ?            | +             |
| Balzano <i>et al.</i> 2017 <sup>19</sup> | +            | -           | -        | -        | ?             | +          | +       | -            | +             |
| Smith & Mezhir 2014 <sup>30</sup>        | +            | -           | -        | -        | +             | +          | +       | -            | +             |
| Pu <i>et al.</i> 2017 <sup>31</sup>      | ?            | -           | -        | -        | ?             | +          | +       | -            | +             |
| Dasari <i>et al.</i> 2015 <sup>20</sup>  | +            | -           | -        | -        | ?             | +          | +       | -            | +             |
| Pu <i>et al.</i> 2018 <sup>21</sup>      | +            | -           | -        | ?        | +             | +          | +       | +            | +             |
| Katz <i>et al.</i> 2012 <sup>32</sup>    | +            | ?           | -        | ?        | +             | +          | +       | +/?          | +             |

\* = low risk of bias / low concern regarding applicability; - = high risk of bias / high level of concern regarding applicability; ? = unclear level of risk of bias / concern regarding applicability; \*blinding was an issue across all studies even where risk and concern were low in other areas
